# Supplementary material
Source: PubMed Central journal article supplement (PMC3266556)

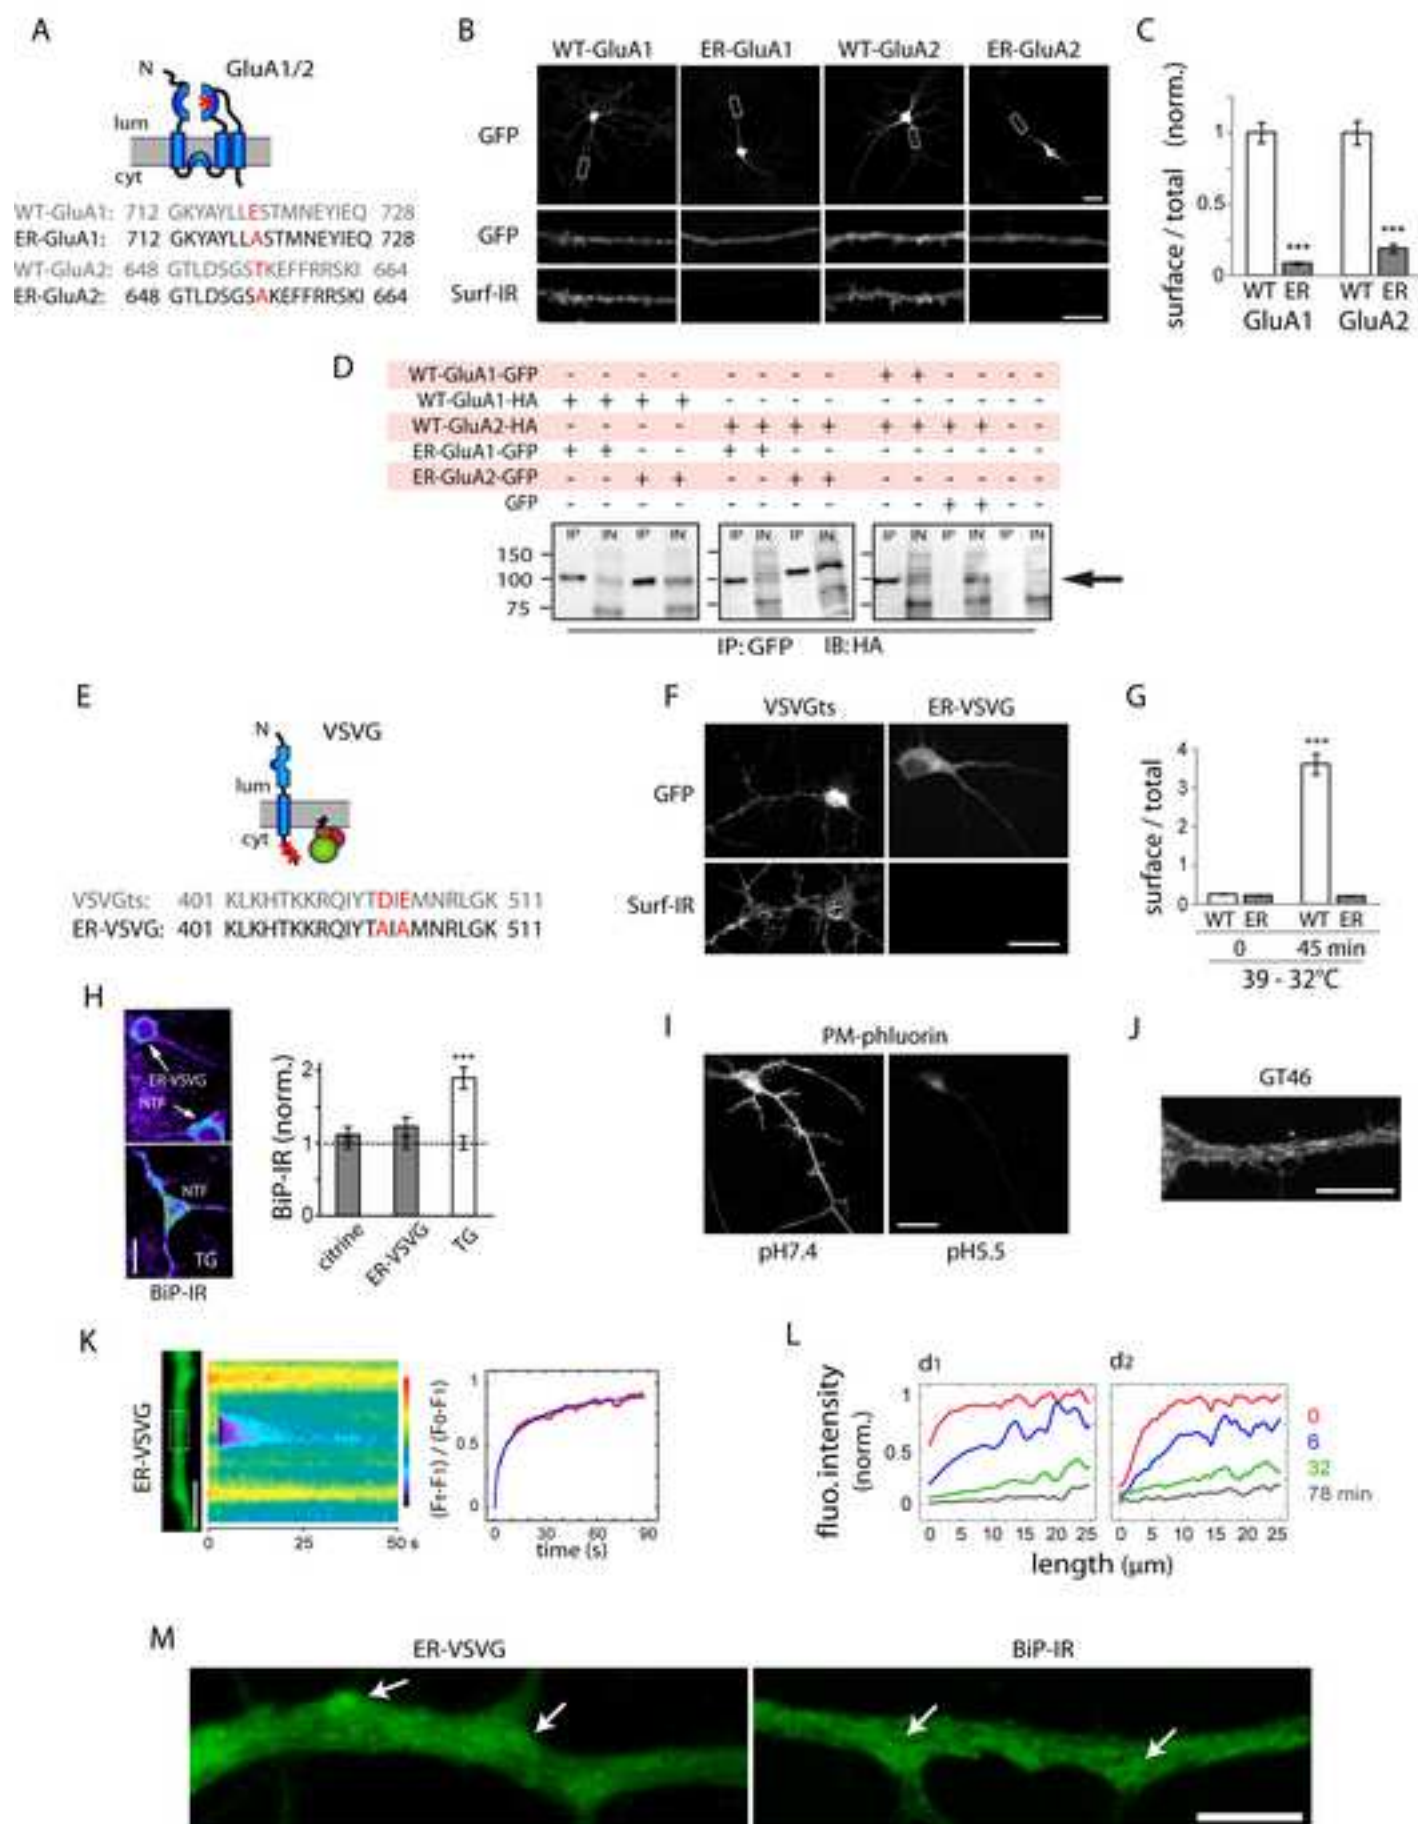

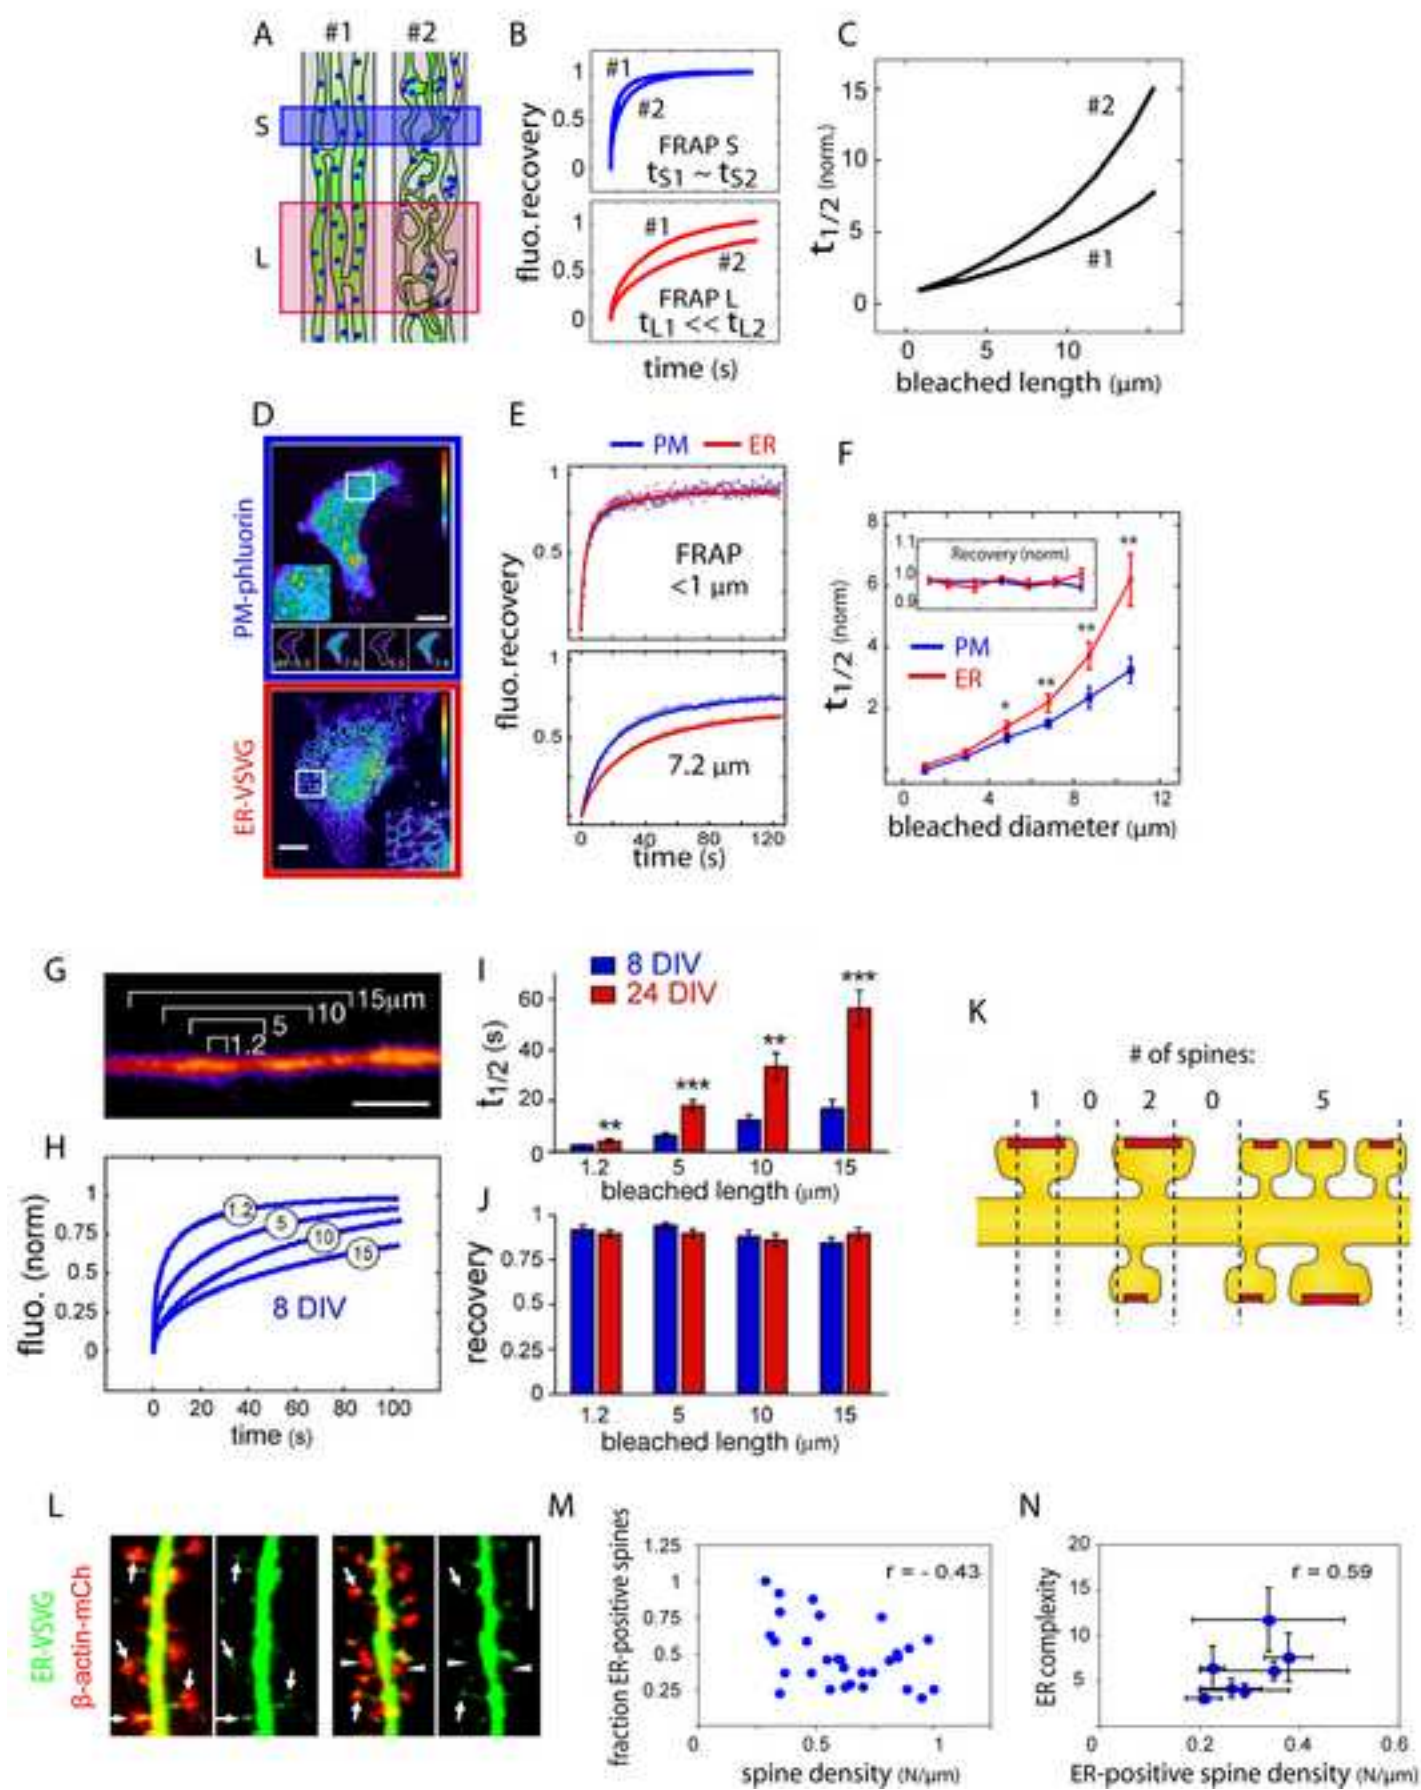

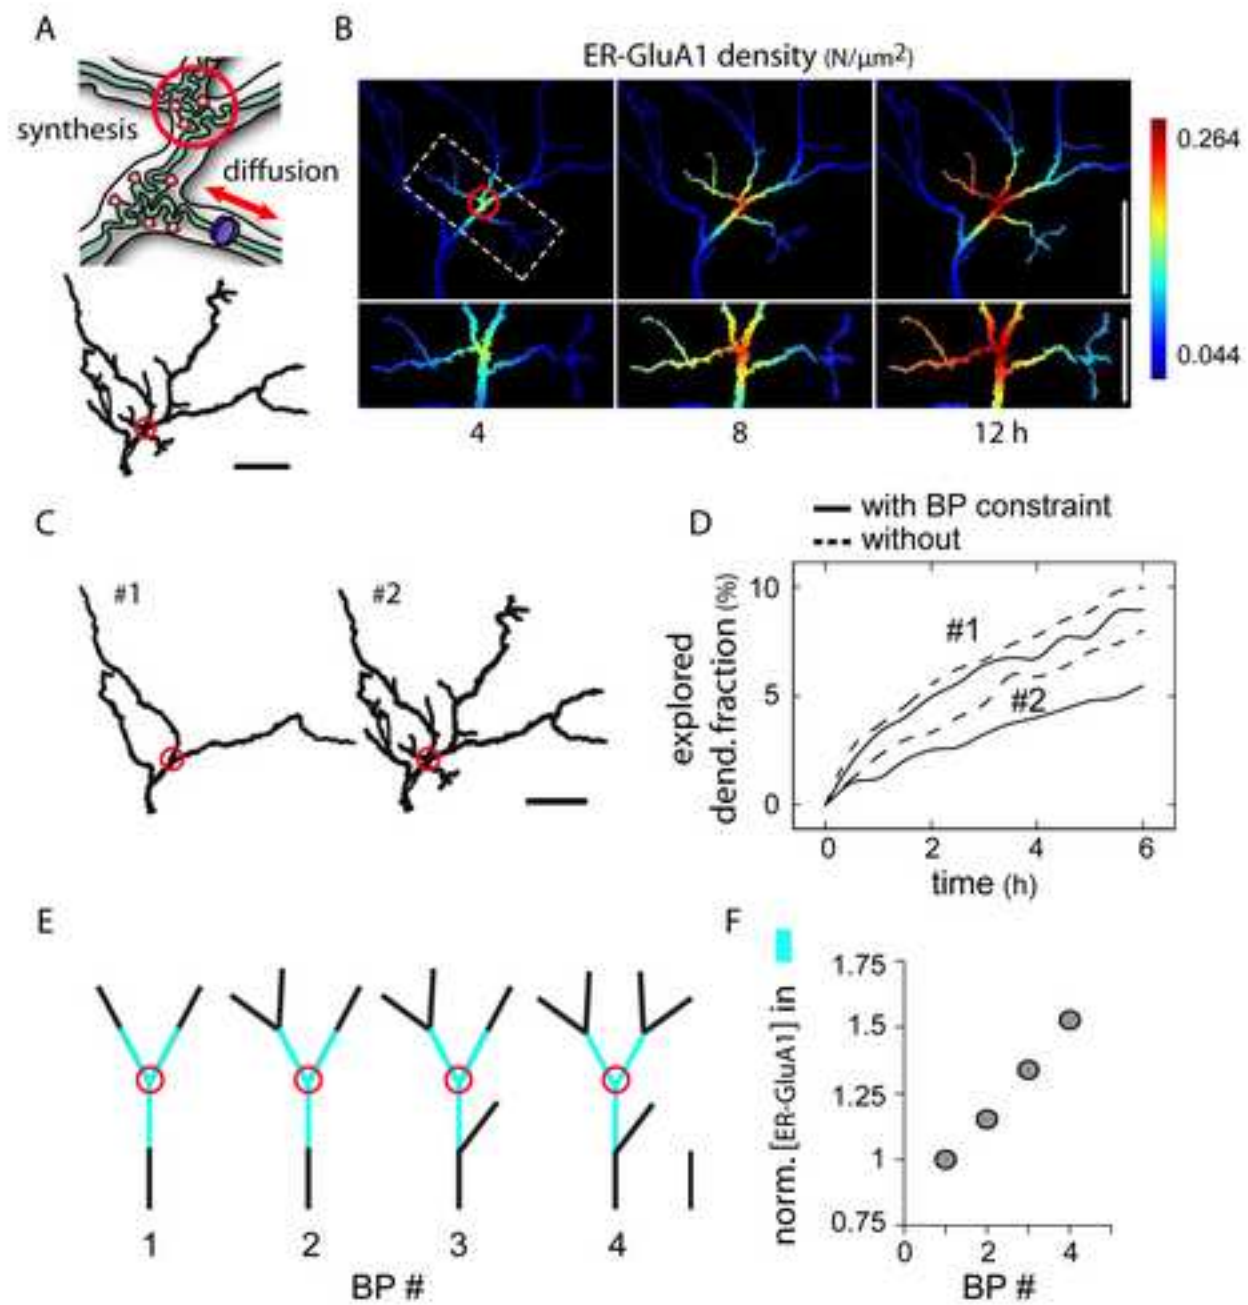

Figure S4, Cui-Wang et al.

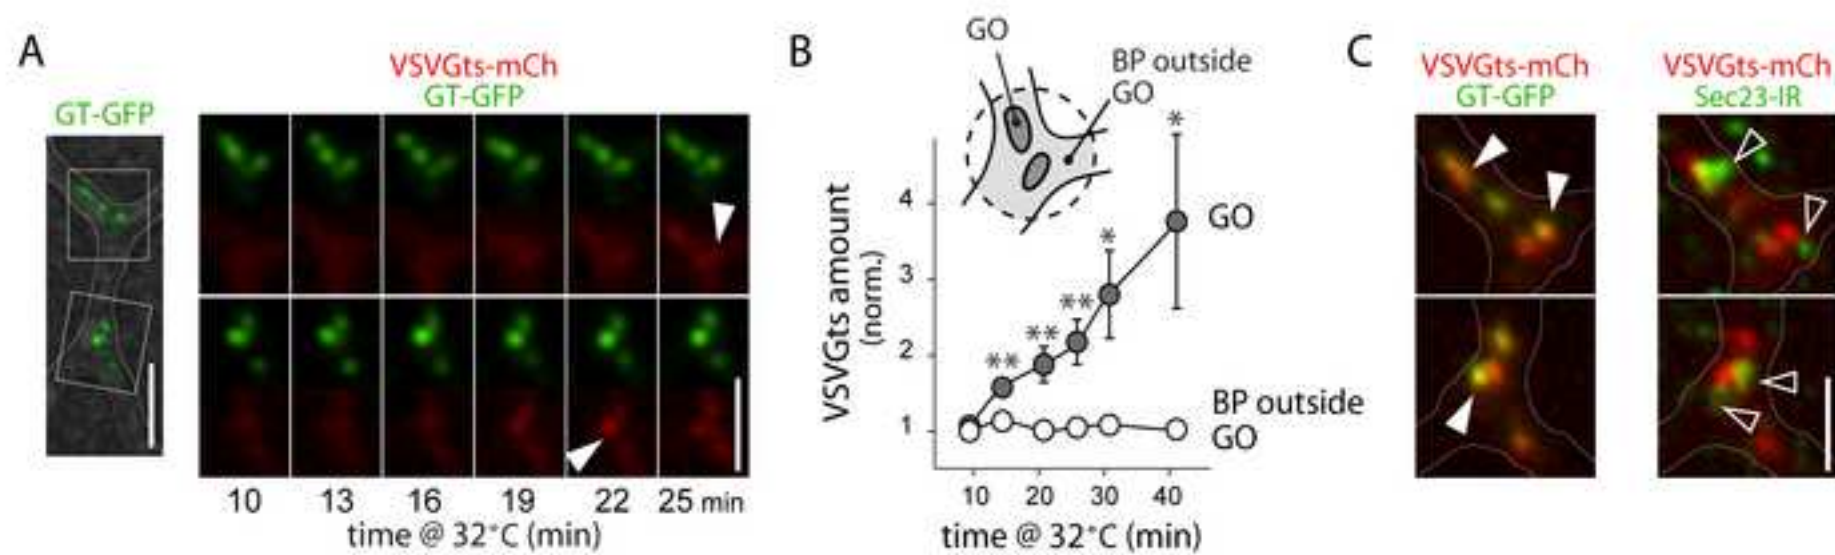



Figure S6, Cui-Wang et al.

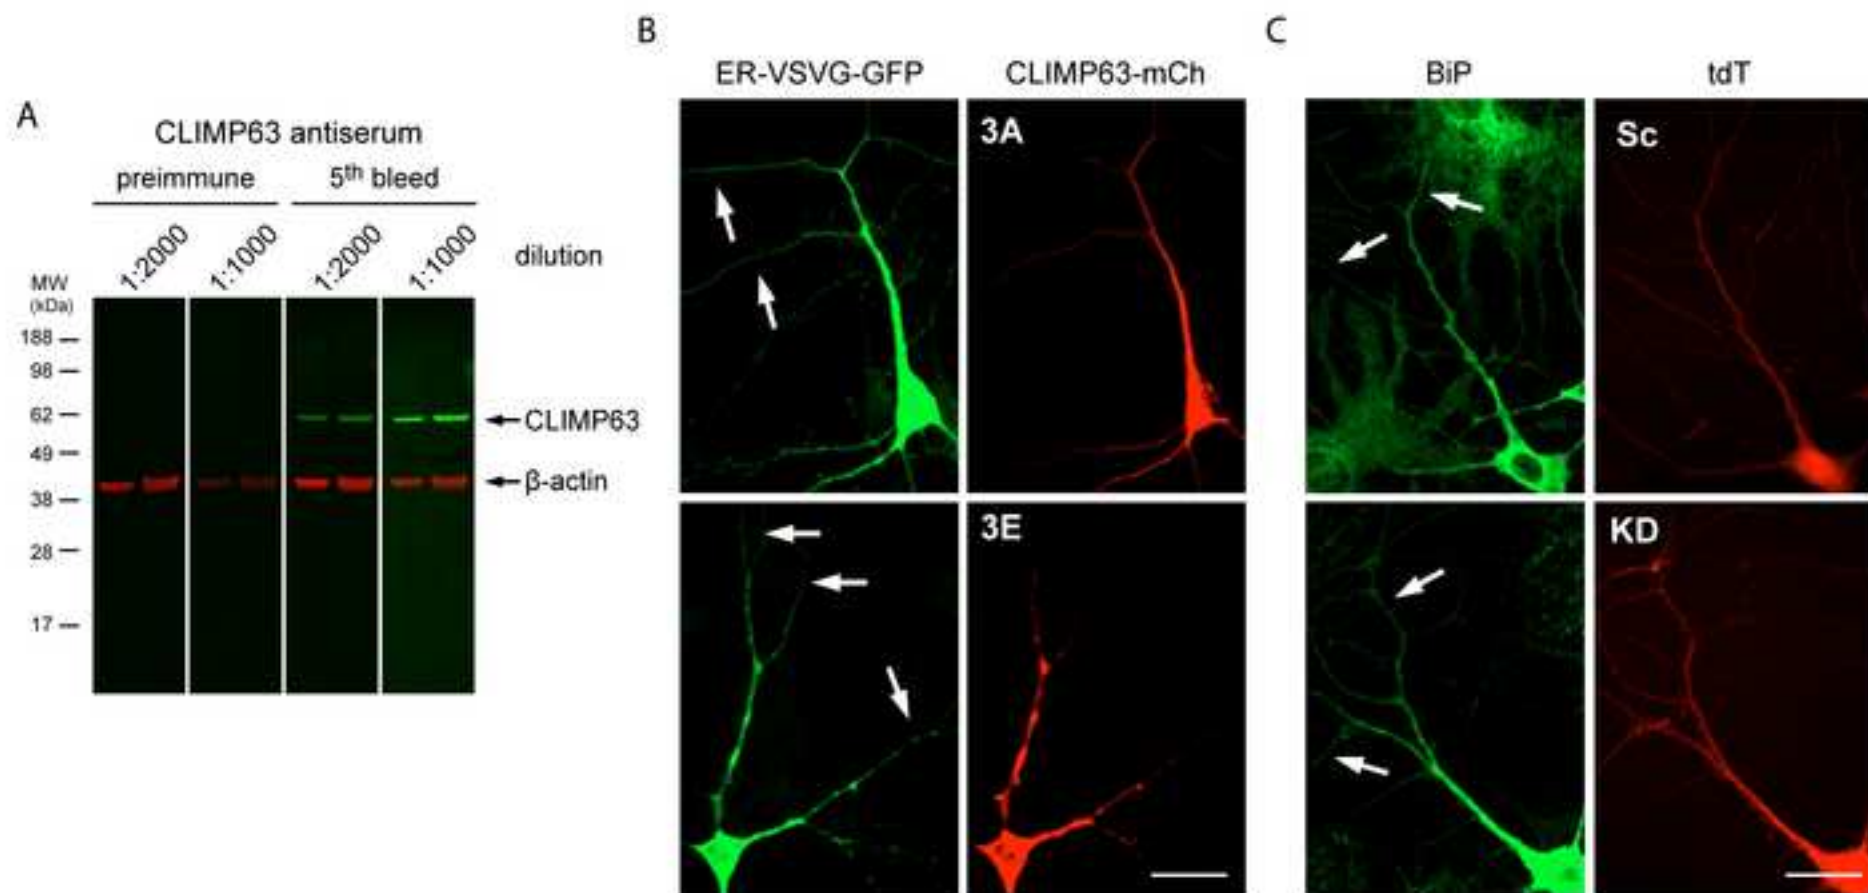

Figure S7, Cui-Wang et al.

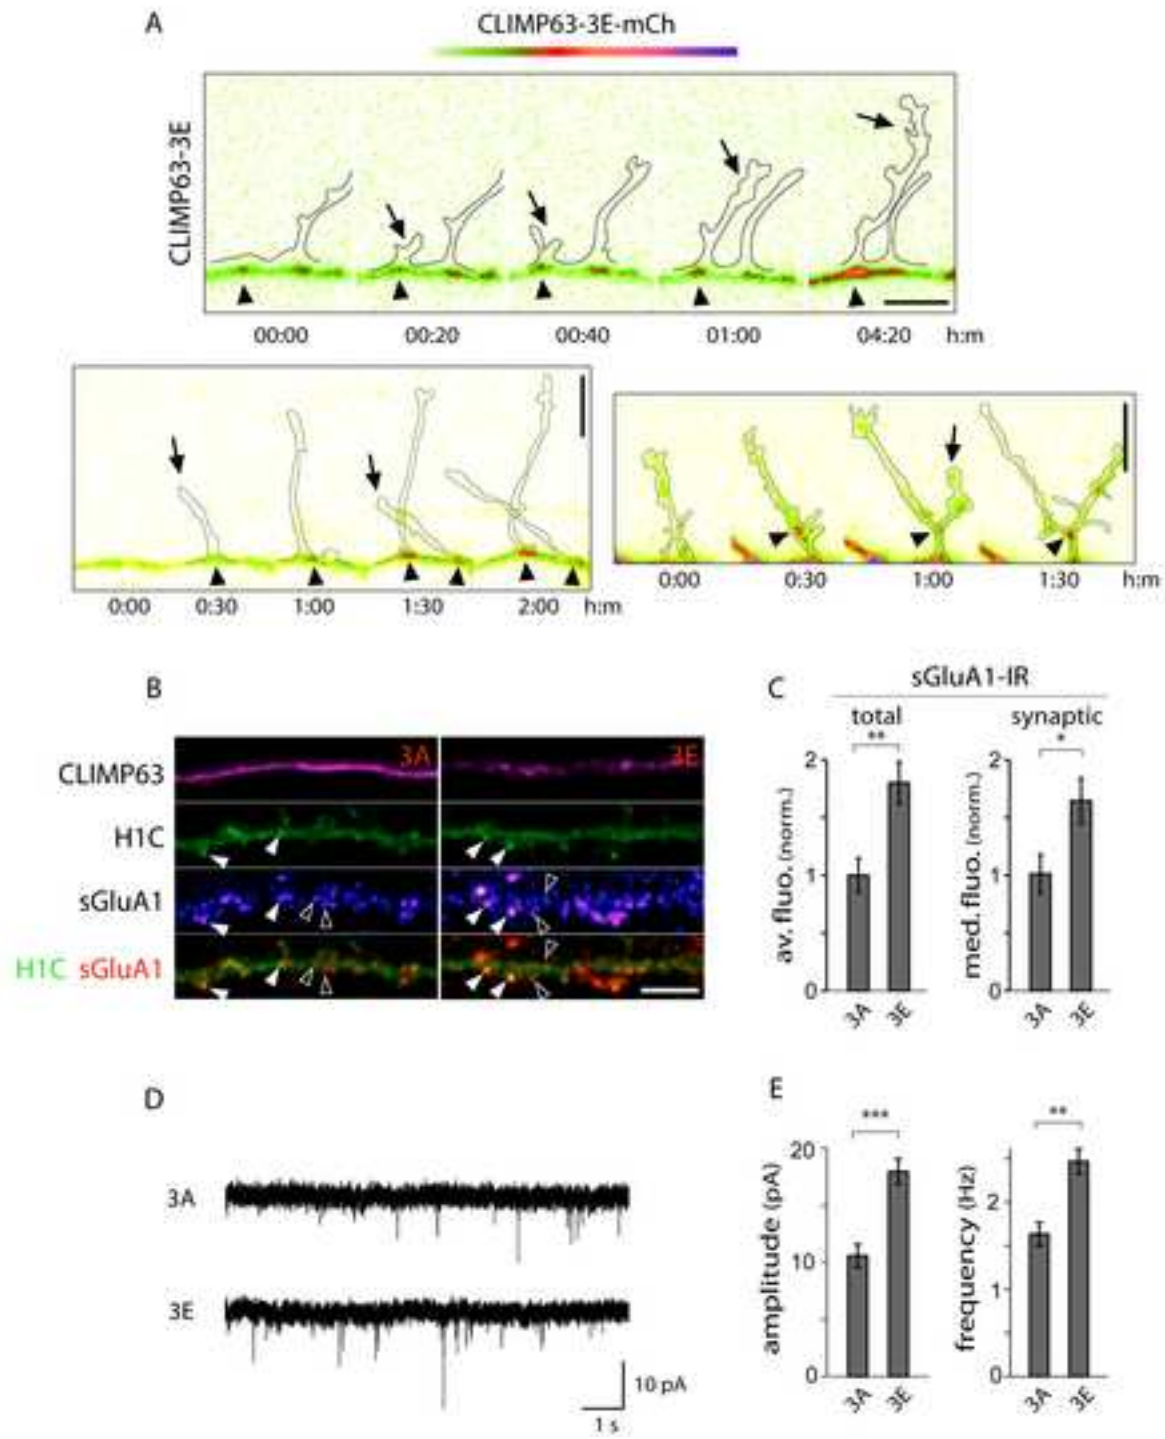

Supplement: NIHMS346202-supplement-02.pdf [file NIHMS346202-supplement-02.pdf]
